## CORRECTION

# Correction: Vegfc acts through ERK to induce sprouting and differentiation of trunk lymphatic progenitors

Masahiro Shin, Ira Male, Timothy J. Beane, Jacques A. Villefranc, Fatma O. Kok, Lihua J. Zhu and Nathan D. Lawson

There was an error published in *Development* **143**, 3785-3795.

In the Materials and Methods section we provided an incorrect serine residue number for the *map2k2b* mutation. The corrected section of text is as follows:

An activated myc-tagged form of MEK was generated from zebrafish *map2k2b* by mutating serines 221 and 225 to aspartic acid (Schramek et al., 1997) by PCR, followed by BP cloning to generate pME-myc-act-*map2k2b*.

In addition, we have since verified that the pME-myc-act-*map2k2b* plasmid used in the original studies and submitted to Addgene contains the correct sequence. This plasmid contains several nucleotide changes in comparison to the GenBank reference sequence (accession number: NM\_001128281). However, all of these changes have been noted in a previous annotation of single nucleotide polymorphisms in the zebrafish and are naturally occurring variants (Butler et al., 2015).

We apologize for any confusion that this may have caused and we thank the researchers who discovered the error for bringing it to our attention.

### Reference

Butler, M. G., Iben, J. R., Marsden, K. C., Epstein, J. A., Granato, M. and Weinstein, B. M. (2015). SNPfisher: tools for probing genetic variation in laboratory-reared zebrafish. *Development* **142**, 1542-1552.
